# Supplementary material for: Phenotypical and Functional Alteration of γδ T Lymphocytes in COVID-19 Patients: Reversal by Statins
Source: MDPI journal article supplement (doi:10.3390/cells11213449), 2022-10-31
Supplement: s1 [file s1]

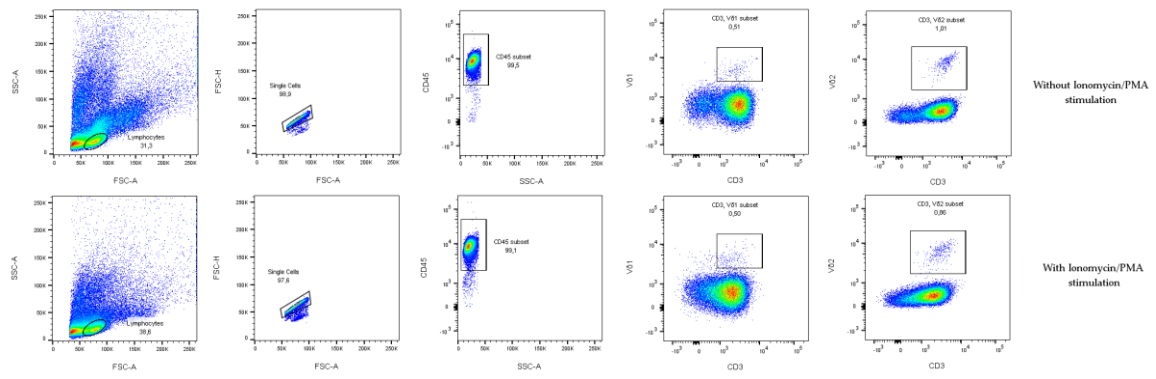

**Supplementary Figure S1:** Gating strategy for the identification of  $\gamma\delta$  T cells before and after Ionomycin/PMA stimulation.
